# Supplementary material for: On the usefulness of mock genomes to define heterotic pools, testers, and hybrid predictions in orphan crops.
Source: Research Square preprint supplement (doi:10.21203/rs.3.rs-2358482/v1), 2022-12-21
Supplement: Supplementary file 1 [file 347a8c7e10701b39014cc62e.xlsx]

## Sheet: Planilha1
		Testers
		HP 1	HP 2
GY	SNP-array	L023	L006
	GBS-B73	L023	L006
	GBS-Mock	L023	L006
PH	SNP-array	L001	L003
	GBS-B73	L001	L003
	GBS-Mock	L001	L003
EH	SNP-array	L001	L003
	GBS-B73	L001	L003
	GBS-Mock	L001	L003
SNP-array: Affymetrix® Axiom Maize Genotyping array; GBS-B73: genotyping-by-sequencing with SNP calling using B73 as reference genome; GBS-Mock: genotyping-by-sequencing with SNP calling using the mock reference built with all parental lines.
