# Supplementary material for: On the usefulness of mock genomes to define heterotic pools, testers, and hybrid predictions in orphan crops.
Source: Research Square preprint supplement (doi:10.21203/rs.3.rs-2358482/v1), 2022-12-21
Supplement: Supplementary file 1 [file fa83e8e2d46b22d9597f458d.pdf]

**Supplementary Information: On the usefulness of mock genomes to define heterotic pools, testers, and hybrid predictions in orphan crops.**

**Supplementary Tables**

**Table S1.** Kendall's correlation in the clustering of datasets.

|                  | <b>GBS-B73</b> | <b>GBS-Mock</b> |
|------------------|----------------|-----------------|
| <b>SNP-array</b> | 0.99**         | 0.96**          |
| <b>GBS-B73</b>   | -              | 0.97**          |

SNP-array: Affymetrix® Axiom Maize Genotyping array; GBS-B73: genotyping-by-sequencing with SNP calling using B73 as reference genome; GBS-Mock: genotyping-by-sequencing with SNP calling using the mock reference built with all parental lines.

\*\* Empirical significance level from permutations.

**Table S2** Variance components and genomic heritability of traits from SNP datasets.

|                      |                  | <b>GY</b> | <b>PH</b> | <b>EH</b> |
|----------------------|------------------|-----------|-----------|-----------|
| $\sigma^2_a$         | <b>SNP-array</b> | 0.14      | 34.27     | 31.55     |
|                      | <b>GBS-B73</b>   | 0.15      | 30.36     | 31.34     |
|                      | <b>GBS-Mock</b>  | 0.14      | 35.82     | 32.49     |
| $\sigma^2_d$         | <b>SNP-array</b> | 0.07      | 5.83      | 1.95      |
|                      | <b>GBS-B73</b>   | 0.09      | 7.88      | 3.08      |
|                      | <b>GBS-Mock</b>  | 0.08      | 3.62      | 1.01      |
| $\sigma^2_r$         | <b>SNP-array</b> | 0.17      | 17.92     | 6.70      |
|                      | <b>GBS-B73</b>   | 0.16      | 18.02     | 7.03      |
|                      | <b>GBS-Mock</b>  | 0.16      | 20.55     | 7.61      |
| <b>H<sup>2</sup></b> | <b>SNP-array</b> | 0.56      | 0.69      | 0.83      |
|                      | <b>GBS-B73</b>   | 0.60      | 0.68      | 0.83      |
|                      | <b>GBS-Mock</b>  | 0.57      | 0.66      | 0.81      |
| <b>h<sup>2</sup></b> | <b>SNP-array</b> | 0.36      | 0.59      | 0.78      |
|                      | <b>GBS-B73</b>   | 0.37      | 0.54      | 0.76      |
|                      | <b>GBS-Mock</b>  | 0.37      | 0.60      | 0.79      |

SNP-array: Affymetrix® Axiom Maize Genotyping array; GBS-B73: genotyping-by-sequencing with SNP calling using B73 as reference genome; GBS-Mock: genotyping-by-sequencing with SNP calling using the mock reference built with all parental lines.

GY: grain yield; PH: plant height; EH: ear.

$\hat{\sigma}^2_a$ ,  $\hat{\sigma}^2_d$  and  $\hat{\sigma}^2_r$ : Additive, dominance and residual variances, respectively; H<sup>2</sup>: broad-sense heritability; h<sup>2</sup>: narrow-sense heritability.

**Table S3** Coincidence in the division of the parental lines into heterotic groups among datasets.

|           |                  | <b>GBS-B73</b> | <b>GBS-Mock</b> |
|-----------|------------------|----------------|-----------------|
| <b>GY</b> | <b>SNP-array</b> | 0.94**         | 1.00**          |
|           | <b>GBS-B73</b>   | -              | 0.94**          |
| <b>PH</b> | <b>SNP-array</b> | 0.94**         | 0.93**          |
|           | <b>GBS-B73</b>   | -              | 0.87**          |
| <b>EH</b> | <b>SNP-array</b> | 0.94**         | 0.93**          |
|           | <b>GBS-B73</b>   | -              | 0.87**          |

SNP-array: Affymetrix® Axiom Maize Genotyping array; GBS-B73: genotyping-by-sequencing with SNP calling using B73 as reference genome; GBS-Mock: genotyping-by-sequencing with SNP calling using the mock reference built with all parental lines.

\*\* Significant at the 0.01 probability level by the t-test.

**Table S4** SCA's and GCA's correlation of the lines between the SNP datasets.

|            |                  | <b>GBS-B73</b> | <b>GBS-Mock</b> |
|------------|------------------|----------------|-----------------|
| <b>SCA</b> |                  |                |                 |
| <b>GY</b>  | <b>SNP-array</b> | 0.97**         | 0.96**          |
|            | <b>GBS-B73</b>   | -              | 0.97**          |
| <b>PH</b>  | <b>SNP-array</b> | 0.97**         | 0.96**          |
|            | <b>GBS-B73</b>   | -              | 0.97**          |
| <b>EH</b>  | <b>SNP-array</b> | 0.97**         | 0.96**          |
|            | <b>GBS-B73</b>   | -              | 0.97**          |
| <b>GCA</b> |                  |                |                 |
| <b>GY</b>  | <b>SNP-array</b> | 0.99**         | 1.00**          |
|            | <b>GBS-B73</b>   | -              | 0.99**          |
| <b>PH</b>  | <b>SNP-array</b> | 1.00**         | 1.00**          |
|            | <b>GBS-B73</b>   | -              | 1.00**          |
| <b>EH</b>  | <b>SNP-array</b> | 1.00**         | 1.00**          |
|            | <b>GBS-B73</b>   | -              | 1.00**          |

SNP-array: Affymetrix® Axiom Maize Genotyping array; GBS-B73: genotyping-by-sequencing with SNP calling using B73 as reference genome; GBS-Mock: genotyping-by-sequencing with SNP calling using the mock reference built with all parental lines.

\*\* Significant at the 0.01 probability level by the t-test.

## Supplementary Figures

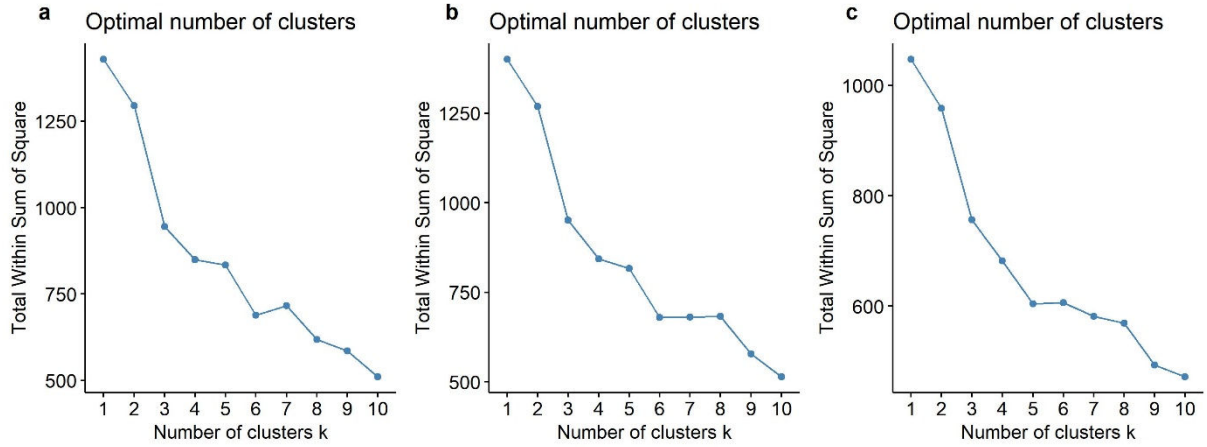

**Figure S1** Optimal number of clusters formed among the 330 parental lines for all SNP datasets by Total Within Sum of Square (WSS) method. **a** SNP-array; **b** GBS-B73; **c** GBS-Mock.

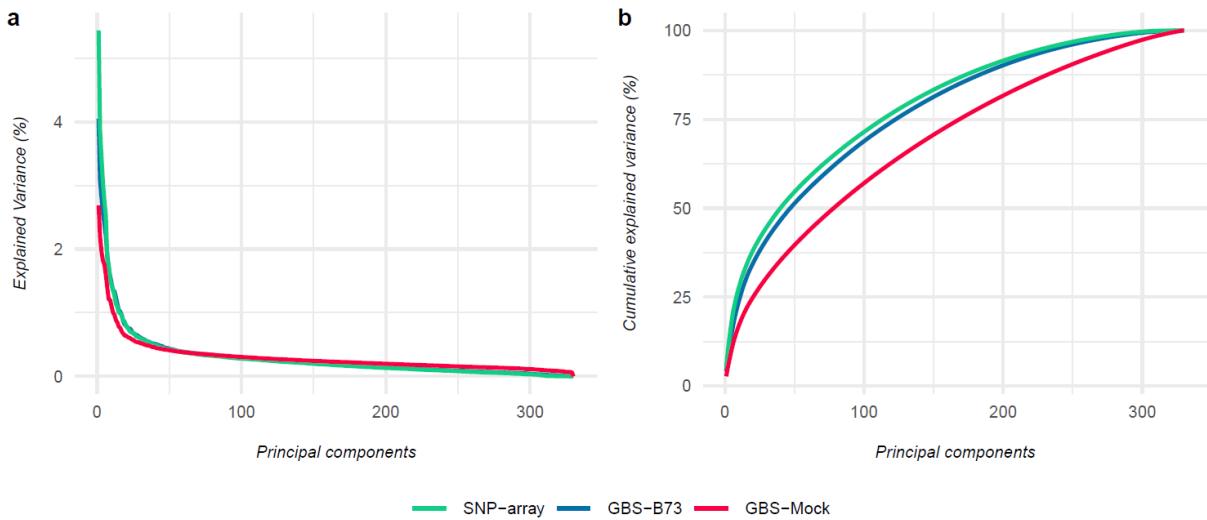

**Figure S2 a** Variance explained by the principal components (PCA) from SNP-array, GBS-B73 e GBS-Mock SNP datasets for 330 tropical parental lines; **b** Cumulative explained variance estimated by principal components from SNP-array, GBS-B73 e GBS-Mock SNP datasets for 360 tropical parental lines.

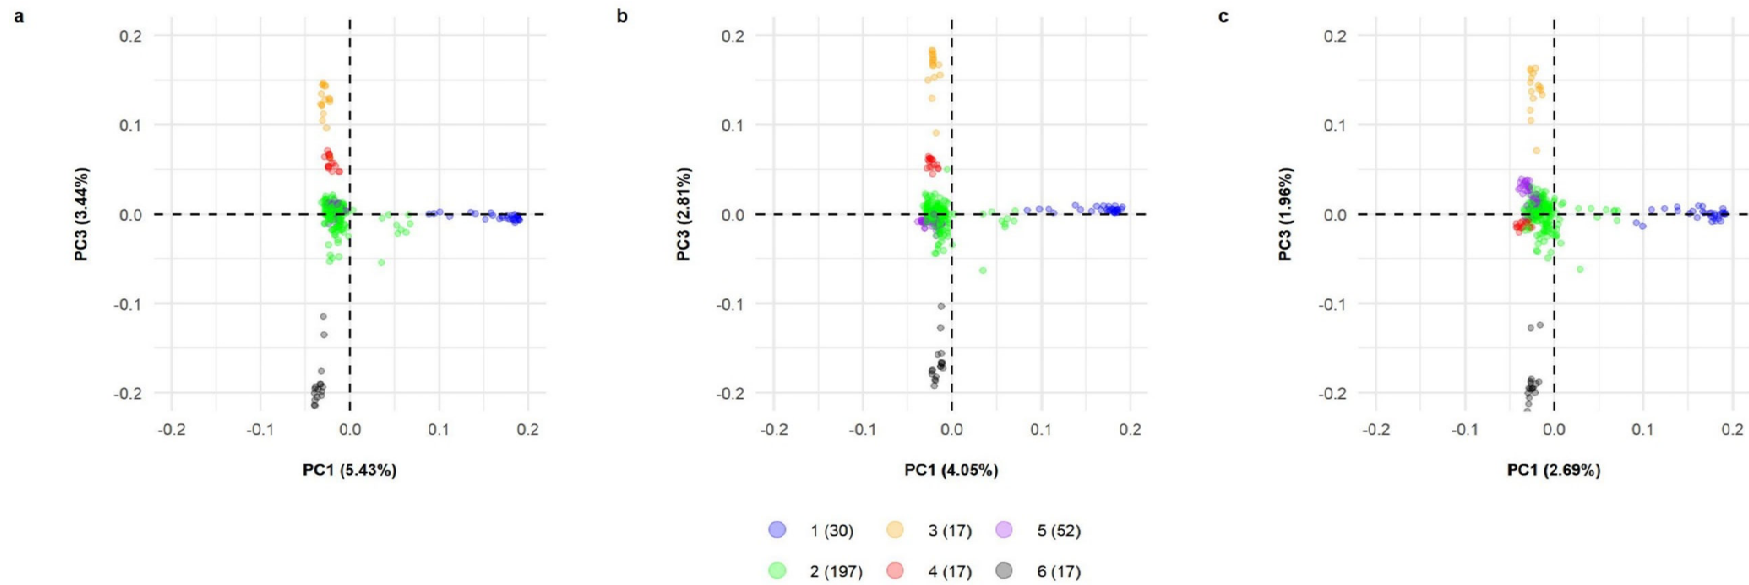

**Figure S3** Bi-plot the first and third principal components using all datasets for 330 tropical parental lines a SNP-array; b GBS-B73 and c GBS-Mock. Explained variance percentages of each principal component are in parentheses. Clusters were used to color-coded parental lines.

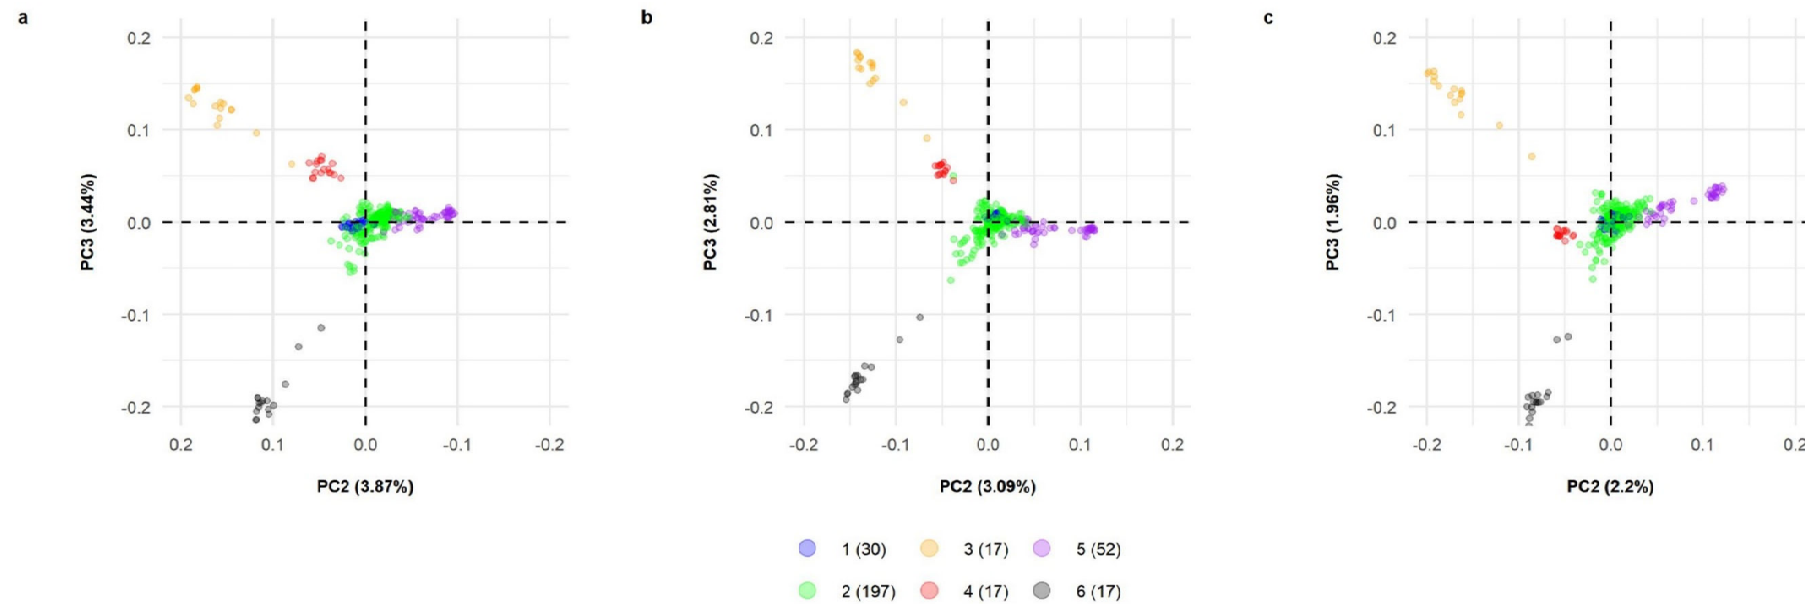

**Figure S4** Bi-plot the second and third principal components using all datasets for 330 tropical parental lines a SNP-array; b GBS-B73 and c GBS-Mock. Explained variance percentages of each principal component are in parentheses. Clusters were used to color-coded parental lines.

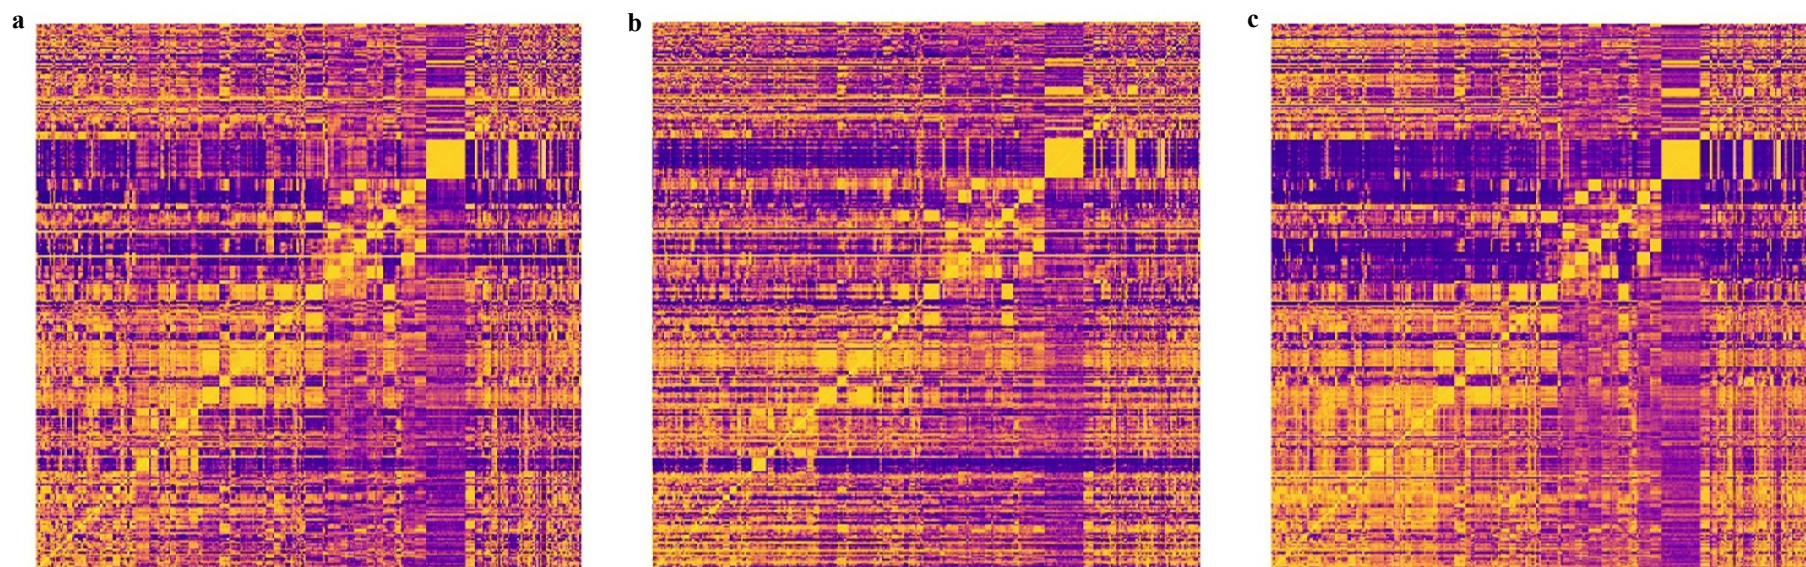

**Figure S5.** Heatmaps of the Rogers genetic distance matrices estimated from a SNP-array, b GBS-B73 and c GBS-Mock-All SNP datasets for 330 tropical parental lines. Lines and columns of each plot were clustered according to the Euclidian distance performed in the Roger genetic distance matrix from the SNP-array dataset.



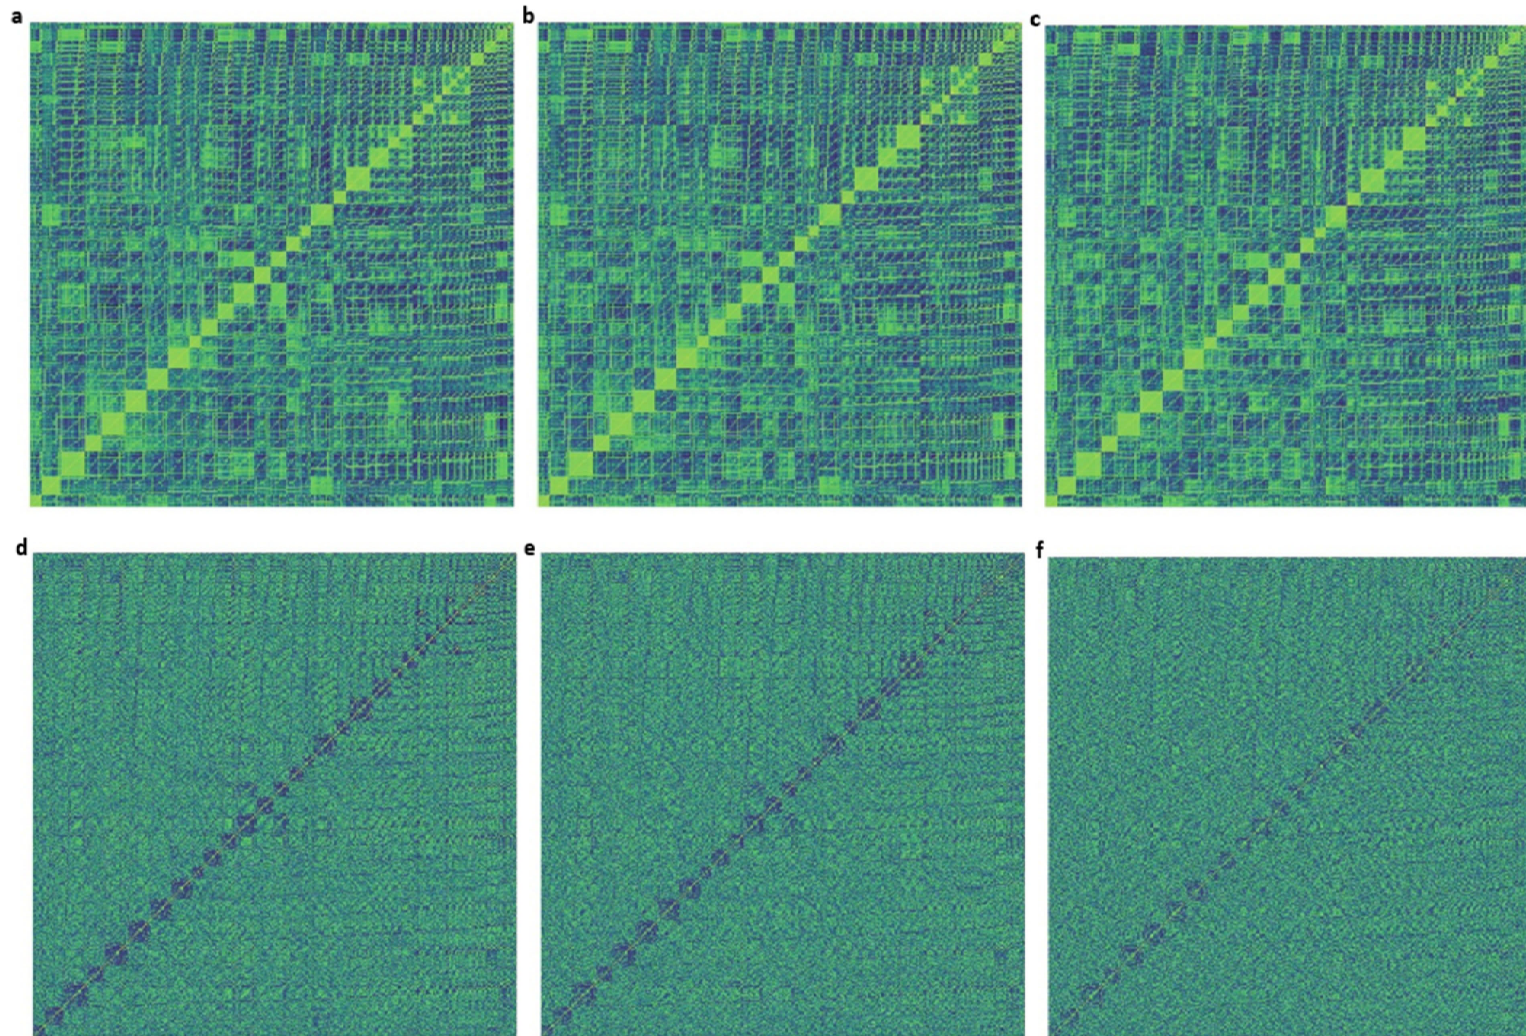

**Figure S6** Heatmaps of the (a, b and c) additive genomic relationship ( $G_a$ ), and (d, e and f) dominance genomic relationship ( $G_d$ ) matrices estimated from (a and d) SNP-array, (b and e) GBS-B73, and (c and f) GBS-Mock SNP datasets for 751 tropical maize single crosses. Lines and columns of each plot were clustered according to the Euclidian distance performed in the genomic relationship matrices from the SNP-array dataset.
