# Supplementary material for: On the usefulness of mock genomes to define heterotic pools, testers, and hybrid predictions in orphan crops.
Source: Research Square preprint supplement (doi:10.21203/rs.3.rs-2358482/v1), 2022-12-21
Supplement: Supplementary file 2 [file ef34cb3f3a431f44b1377ae6.xlsx]

## Sheet: Planilha1
		GBS-B73	GBS-Mock
GD	SNP-array	0.91**	0.83**
	GBS-B73	-	0.91**
Ga	SNP-array	0.97**	0.96**
	GBS-B73	-	0.99**
Gd	SNP-array	0.78**	0.58**
	GBS-B73	-	0.72**
SNP-array: Affymetrix® Axiom Maize Genotyping array; GBS-B73: genotyping-by-sequencing with SNP calling using B73 as reference genome; GBS-Mock: genotyping-by-sequencing with SNP calling using the mock reference built with all parental lines.
** Empirical significance level from permutations.
Rogers genetic distance (GD) matrices were computed with markers from 330 parental lines data.
𝑮𝒂 and 𝑮𝒅 matrices were computed with markers from 751 maize singles-crosses.
